# Supplementary material
Source: publisher figshare collection journal article supplement (https://karger.figshare.com/articles/dataset/_/12533309)
Supplement: Supplementary file 2 [file 1]

## Supplementary data

**Fig. S1. Pedigree and co-segregation analyses of the novel frameshift mutation in the *BCL11A* gene.** Sequencing chromatograms confirmed that the new frameshift deletion (c.271delG) occurred *de-novo* in the patient (II.2.). The unaffected family members, including mother (I.1), father (I.2), and older sister (II.1) did not show any sequence alteration at this nucleotide position.

**Table S1. Summary of WES data after variant calling and annotation.**

| ID  | Reads    | % Aln | Depth | Variants | Hom.   | Het.   | SNP    | Indel |
|-----|----------|-------|-------|----------|--------|--------|--------|-------|
| P   | 114.90 M | 99.5% | 83.94 | 57'553   | 21'371 | 31'566 | 52'964 | 4'608 |
| M-P | 109.28 M | 99.5% | 79.42 | 58'174   | 21'589 | 31'606 | 53'227 | 4'592 |
| F-P | 121.47   | 99.5% | 72.68 | 57'809   | 20'852 | 32'747 | 53'633 | 4'555 |

Abbreviations: number of aligned reads in percent (% Aln), average depth of coverage (depth), homozygous variants (hom.), heterozygous variants (het.), single nucleotide polymorphism (SNP), inserts and/or deletions (Indel), the patient (P), the healthy mother (M-P), and the healthy father (F-P).

**Table S2. The *BCL11A* sequence variants detected in the investigated patient.**

| Variant effect | gDNA start | gDNA stop  | cDNA          | AA change  | LF | AIF   | ExAC | GTN P | GTN M-P | GTN F-P |
|----------------|------------|------------|---------------|------------|----|-------|------|-------|---------|---------|
| synonymous     | 60,687,959 | 60,687,959 | c.2088T>C     | p.(=)      | 41 | 7'311 | 0.70 | 1/1   | 0/1     | 1/1     |
| intronic       | 60,768,978 | 60,768,978 | c.385+4128C>T | p.(=)      | 35 | 1'532 | 0.65 | 0/1   | 1/1     | -       |
| frameshift     | 60,773,219 | 60,773,220 | c.271delG     | p.E91Rfs*2 | 1  | 0     | nf   | 0/1   | -       | -       |

The variants were annotated based on the isoform L of the *BCL11A* gene (NM\_018014.3). Abbreviations: nucleotide positions on the human chromosome 2 (gDNA start, gDNA stop), amino acid exchange (AA), statistical data from local database (LF), statistical data from external database (AF), total allele frequencies in percent according to the Exome Aggregation Consortium (ExAC), numeric genotypes (GTN), homozygous variant (1/1), heterozygous variant (0/1), lack of alterations in the reference sequence (-), not found (nf), the patient (P), the healthy mother (M-P), and the healthy father (F-P).

**Table S3. Panel of genes associated with epilepsies and epileptic syndromes.**

| <b>No.</b> | <b>Gene</b> | <b>OMIM No.</b> | <b>Phenotype</b> |
|------------|-------------|-----------------|------------------|
| 1          | ABAT        | 137150          | Ep-s             |
| 2          | ABCC8       | 600509          | Ep-s             |
| 3          | ABCD1       | 300371          | Ep-s             |
| 4          | ACY1        | 104620          | Ep-s             |
| 5          | ADAR        | 146920          | Ep-s             |
| 6          | ADK         | 102750          | Ep-s             |
| 7          | ADSL        | 608222          | Ep-s             |
| 8          | AFG3L2      | 604581          | Ep-s             |
| 9          | AIFM1       | 300169          | Ep-r             |
| 10         | AIMP1       | 603605          | Ep-r             |
| 11         | ALDH4A1     | 606811          | Ep-s             |
| 12         | ALDH5A1     | 610045          | Ep-s             |
| 13         | ALDH7A1     | 107323          | Ep-s             |
| 14         | ALG13       | 300776          | Ep-s             |
| 15         | ALG3        | 608750          | Ep-s             |
| 16         | AMACR       | 604489          | Ep-s             |
| 17         | AMT         | 238310          | Ep-s             |
| 18         | AP3B2       | 602166          | Ep-s             |
| 19         | AP4B1       | 607245          | Ep-s             |
| 20         | AP4E1       | 607244          | Ep-s             |
| 21         | AP4M1       | 602296          | Ep-s             |
| 22         | AP4S1       | 607243          | Ep-s             |
| 23         | ARG1        | 608313          | Ep-s             |
| 24         | ARHGEF9     | 300429          | Ep-s             |
| 25         | ARSA        | 607574          | Ep-s             |
| 26         | ARV1        | 611647          | Ep-s             |
| 27         | ARX         | 300382          | Ep-s             |
| 28         | ASAH1       | 613468          | Ep-s             |
| 29         | ASNS        | 108370          | Ep-s             |
| 30         | ASPA        | 608034          | Ep-r             |
| 31         | ATIC        | 601731          | Ep-s             |
| 32         | ATP13A2     | 610513          | Ep-s             |
| 33         | ATP1A2      | 182340          | Ep-s             |

|    |         |        |      |
|----|---------|--------|------|
| 34 | ATP1A3  | 182350 | Ep-s |
| 35 | ATP6AP2 | 300556 | Ep-s |
| 36 | ATRX    | 300032 | Ep-s |
| 37 | AUH     | 600529 | Ep-r |
| 38 | BCKDHA  | 608348 | Ep-s |
| 39 | BCKDHB  | 248611 | Ep-s |
| 40 | BCKDK   | 614901 | Ep-s |
| 41 | BCS1L   | 603647 | Ep-s |
| 42 | BRAT1   | 614506 | Ep-s |
| 43 | BTB     | 609019 | Ep-s |
| 44 | CACNA1A | 601011 | Ep-s |
| 45 | CACNA1D | 114206 | Ep-s |
| 46 | CACNA1H | 607904 | Ep-s |
| 47 | CACNB4  | 601949 | Ep-s |
| 48 | CAD     | 114010 | Ep-s |
| 49 | CARS2   | 612800 | Ep-s |
| 50 | CASK    | 300172 | Ep-s |
| 51 | CASR    | 601199 | Ep-s |
| 52 | CDKL5   | 300203 | Ep-s |
| 53 | CERS1   | 606919 | Ep-s |
| 54 | CHD2    | 602119 | Ep-s |
| 55 | CHRNA2  | 118502 | Ep-s |
| 56 | CHRNA4  | 118504 | Ep-s |
| 57 | CHRNA7  | 118511 | Ep-s |
| 58 | CHRNA2  | 118507 | Ep-s |
| 59 | CLCN2   | 600570 | Ep-s |
| 60 | CLCN4   | 302910 | Ep-s |
| 61 | CLN3    | 607042 | Ep-s |
| 62 | CLN5    | 608102 | Ep-s |
| 63 | CLN6    | 606725 | Ep-s |
| 64 | CLN8    | 607837 | Ep-s |
| 65 | CNNM2   | 607803 | Ep-s |
| 66 | CNTNAP2 | 604569 | Ep-s |
| 67 | COL4A1  | 120130 | Ep-s |
| 68 | COQ4    | 612898 | Ep-s |

|     |         |        |      |
|-----|---------|--------|------|
| 69  | COX15   | 603646 | Ep-s |
| 70  | COX6B1  | 124089 | Ep-s |
| 71  | COX8A   | 123870 | Ep-s |
| 72  | CPA6    | 609562 | Ep-s |
| 73  | CPT1A   | 600528 | Ep-s |
| 74  | CPT2    | 600650 | Ep-s |
| 75  | CRH     | 122560 | Ep-s |
| 76  | CSF1R   | 164770 | Ep-s |
| 77  | CSTB    | 601145 | Ep-s |
| 78  | CTC1    | 613129 | Ep-s |
| 79  | CTSD    | 116840 | Ep-s |
| 80  | CTSF    | 603539 | Ep-s |
| 81  | CUL4B   | 300304 | Ep-s |
| 82  | CYP27A1 | 606530 | Ep-s |
| 83  | D2HGDH  | 609186 | Ep-s |
| 84  | DARS2   | 610956 | Ep-s |
| 85  | DBT     | 248610 | Ep-s |
| 86  | DCX     | 300121 | Ep-s |
| 87  | DDC     | 107930 | Ep-s |
| 88  | DDX3X   | 300160 | Ep-s |
| 89  | DENND5A | 617278 | Ep-s |
| 90  | DEPDC5  | 614191 | Ep-s |
| 91  | DHFR    | 126060 | Ep-s |
| 92  | DLD     | 238331 | Ep-s |
| 93  | DNAJC5  | 611203 | Ep-s |
| 94  | DNM1    | 602377 | Ep-s |
| 95  | DNM1L   | 603850 | Ep-s |
| 96  | DOCK7   | 615730 | Ep-s |
| 97  | DPYD    | 612779 | Ep-s |
| 98  | DPYS    | 613326 | Ep-s |
| 99  | DYRK1A  | 600855 | Ep-s |
| 100 | EARS2   | 612799 | Ep-s |
| 101 | ECHS1   | 602292 | Ep-s |
| 102 | ECM1    | 602201 | Ep-s |
| 103 | EEF1A2  | 602959 | Ep-s |

|     |         |        |      |
|-----|---------|--------|------|
| 104 | EFHC1   | 608815 | Ep-s |
| 105 | EIF2B1  | 606686 | Ep-s |
| 106 | EIF2B2  | 606454 | Ep-s |
| 107 | EIF2B3  | 606273 | Ep-r |
| 108 | EIF2B4  | 606687 | Ep-r |
| 109 | EIF2B5  | 603945 | Ep-r |
| 110 | EPM2A   | 607566 | Ep-s |
| 111 | ETFA    | 608053 | Ep-s |
| 112 | ETFB    | 130410 | Ep-s |
| 113 | ETFDH   | 231675 | Ep-s |
| 114 | ETHE1   | 608451 | Ep-s |
| 115 | FA2H    | 611026 | Ep-s |
| 116 | FAM126A | 610531 | Ep-s |
| 117 | FAR1    | 616107 | Ep-s |
| 118 | FARS2   | 611592 | Ep-s |
| 119 | FGF12   | 601513 | Ep-s |
| 120 | FH      | 136850 | Ep-s |
| 121 | FLNA    | 300017 | Ep-s |
| 122 | FOLR1   | 136430 | Ep-s |
| 123 | FOXG1   | 164874 | Ep-s |
| 124 | FOXRED1 | 613622 | Ep-s |
| 125 | FRRS1L  | 604574 | Ep-s |
| 126 | GABRA1  | 137160 | Ep-s |
| 127 | GABRB1  | 137190 | Ep-s |
| 128 | GABRB2  | 600232 | Ep-s |
| 129 | GABRB3  | 137192 | Ep-s |
| 130 | GABRD   | 137163 | Ep-s |
| 131 | GABRG2  | 137164 | Ep-s |
| 132 | GALC    | 606890 | Ep-s |
| 133 | GAMT    | 601240 | Ep-s |
| 134 | GCDH    | 608801 | Ep-s |
| 135 | GCH1    | 600225 | Ep-s |
| 136 | GCK     | 138079 | Ep-s |
| 137 | GCSH    | 238330 | Ep-s |
| 138 | GFAP    | 137780 | Ep-s |

|     |          |        |      |
|-----|----------|--------|------|
| 139 | GFM1     | 606639 | Ep-s |
| 140 | GJC2     | 608803 | Ep-s |
| 141 | GLB1     | 611458 | Ep-s |
| 142 | GLDC     | 238300 | Ep-s |
| 143 | GLRA1    | 138491 | Ep-s |
| 144 | GLRB     | 138492 | Ep-s |
| 145 | GLUD1    | 138130 | Ep-s |
| 146 | GLUL     | 138290 | Ep-s |
| 147 | GNAO1    | 139311 | Ep-s |
| 148 | GNB1     | 139380 | Ep-s |
| 149 | GNE      | 603824 | Ep-s |
| 150 | GOSR2    | 604027 | Ep-s |
| 151 | GPHN     | 603930 | Ep-s |
| 152 | GRIA3    | 305915 | Ep-s |
| 153 | GRIK2    | 138244 | Ep-s |
| 154 | GRIN1    | 138249 | Ep-s |
| 155 | GRIN2A   | 138253 | Ep-s |
| 156 | GRIN2B   | 138252 | Ep-s |
| 157 | GRIN2D   | 602717 | Ep-s |
| 158 | GRN      | 607485 | Ep-s |
| 159 | GTPBP3   | 608536 | Ep-s |
| 160 | HACE1    | 610876 | Ep-s |
| 161 | HADH     | 601609 | Ep-s |
| 162 | HCN1     | 602780 | Ep-s |
| 163 | HDAC4    | 605314 | Ep-s |
| 164 | HECW2    | 617245 | Ep-s |
| 165 | HEPACAM  | 611642 | Ep-s |
| 166 | HIBCH    | 610690 | Ep-s |
| 167 | HLCS     | 609018 | Ep-s |
| 168 | HNRNPU   | 602869 | Ep-s |
| 169 | HPD      | 609695 | Ep-s |
| 170 | HSD17B10 | 300256 | Ep-s |
| 171 | HSPD1    | 118190 | Ep-s |
| 172 | HTRA1    | 602194 | Ep-s |
| 173 | HTT      | 182138 | Ep-s |

|     |        |        |      |
|-----|--------|--------|------|
| 174 | HUWE1  | 300697 | Ep-s |
| 175 | IBA57  | 615316 | Ep-s |
| 176 | IDH2   | 147650 | Ep-s |
| 177 | INSR   | 147670 | Ep-s |
| 178 | IQSEC2 | 300522 | Ep-s |
| 179 | ITPA   | 147520 | Ep-s |
| 180 | IVD    | 607036 | Ep-s |
| 181 | JRK    | 603210 | Ep-s |
| 182 | KANSL1 | 612452 | Ep-s |
| 183 | KCNA1  | 176260 | Ep-s |
| 184 | KCNA2  | 176262 | Ep-s |
| 185 | KCNB1  | 600397 | Ep-s |
| 186 | KCNC1  | 176258 | Ep-s |
| 187 | KCNH1  | 603305 | Ep-s |
| 188 | KCNJ10 | 602208 | Ep-s |
| 189 | KCNJ11 | 600937 | Ep-s |
| 190 | KCNMA1 | 600150 | Ep-s |
| 191 | KCNQ1  | 607542 | Ep-s |
| 192 | KCNQ2  | 602235 | Ep-s |
| 193 | KCNQ3  | 602232 | Ep-s |
| 194 | KCNT1  | 608167 | Ep-s |
| 195 | KCTD7  | 611725 | Ep-s |
| 196 | KDM5C  | 314690 | Ep-s |
| 197 | KIF1A  | 601255 | Ep-s |
| 198 | KIF5C  | 604593 | Ep-s |
| 199 | L2HGDH | 609584 | Ep-s |
| 200 | LGI1   | 604619 | Ep-s |
| 201 | LIAS   | 607031 | Ep-s |
| 202 | LMNB1  | 150340 | Ep-s |
| 203 | LMNB2  | 150341 | Ep-s |
| 204 | LRPPRC | 607544 | Ep-s |
| 205 | LYRM7  | 615831 | Ep-m |
| 206 | MAGI2  | 606382 | Ep-s |
| 207 | MAPK10 | 602897 | Ep-s |
| 208 | MARS2  | 609728 | Ep-s |

|     |         |        |      |
|-----|---------|--------|------|
| 209 | MBD5    | 611472 | Ep-s |
| 210 | MBOAT7  | 606048 | Ep-s |
| 211 | MCCC1   | 609010 | Ep-s |
| 212 | MDH2    | 154100 | Ep-s |
| 213 | MECP2   | 300005 | Ep-s |
| 214 | MED12   | 300188 | Ep-s |
| 215 | MEF2C   | 600662 | Ep-s |
| 216 | MFSD8   | 611124 | Ep-s |
| 217 | MLC1    | 605908 | Ep-s |
| 218 | MLYCD   | 606761 | Ep-s |
| 219 | MMACHC  | 609831 | Ep-s |
| 220 | MOCS1   | 603707 | Ep-s |
| 221 | MOCS2   | 603708 | Ep-s |
| 222 | MRPL44  | 61184  | Ep-s |
| 223 | MTFMT   | 611766 | Ep-m |
| 224 | MTHFR   | 236250 | Ep-s |
| 225 | MTOR    | 601231 | Ep-s |
| 226 | NACC1   | 610672 | Ep-s |
| 227 | NARS2   | 612803 | Ep-s |
| 228 | NDUFA1  | 300078 | Ep-s |
| 229 | NDUFAF5 | 612360 | Ep-m |
| 230 | NDUFAF6 | 612392 | Ep-m |
| 231 | NDUFS2  | 602985 | Ep-m |
| 232 | NDUFS4  | 602694 | Ep-m |
| 233 | NDUFS7  | 601825 | Ep-m |
| 234 | NDUFS8  | 602141 | Ep-m |
| 235 | NDUFV1  | 161015 | Ep-s |
| 236 | NECAP1  | 611623 | Ep-s |
| 237 | NEU1    | 608272 | Ep-s |
| 238 | NHLRC1  | 608072 | Ep-s |
| 239 | NOTCH3  | 600276 | Ep-s |
| 240 | NPRL2   | 607072 | Ep-s |
| 241 | NPRL3   | 600928 | Ep-s |
| 242 | NR2F1   | 132890 | Ep-s |
| 243 | NRXN1   | 600565 | Ep-s |



|     |        |        |      |
|-----|--------|--------|------|
| 244 | NUBPL  | 613621 | Ep-m |
| 245 | OFD1   | 300170 | Ep-s |
| 246 | OPHN1  | 300127 | Ep-s |
| 247 | PACS2  | 610423 | Ep-s |
| 248 | PC     | 608786 | Ep-s |
| 249 | PCBD1  | 126090 | Ep-s |
| 250 | PCCA   | 232000 | Ep-s |
| 251 | PCCB   | 232050 | Ep-s |
| 252 | PCDH19 | 300460 | Ep-s |
| 253 | PDHA1  | 300502 | Ep-s |
| 254 | PDHX   | 608769 | Ep-s |
| 255 | PDSS2  | 610564 | Ep-s |
| 256 | PET100 | 614770 | Ep-m |
| 257 | PGAP1  | 611655 | Ep-s |
| 258 | PGAP2  | 615187 | Ep-s |
| 259 | PGAP3  | 611801 | Ep-s |
| 260 | PGK1   | 311800 | Ep-s |
| 261 | PHF6   | 300414 | Ep-s |
| 262 | PHGDH  | 606879 | Ep-s |
| 263 | PIGA   | 311770 | Ep-s |
| 264 | PIGG   | 616918 | Ep-s |
| 265 | PIGL   | 605947 | Ep-s |
| 266 | PIGM   | 610273 | Ep-s |
| 267 | PIGN   | 606097 | Ep-s |
| 268 | PIGO   | 614730 | Ep-s |
| 269 | PIGT   | 610272 | Ep-s |
| 270 | PIGV   | 610274 | Ep-s |
| 271 | PIGW   | 610275 | Ep-s |
| 272 | PIGY   | 610662 | Ep-s |
| 273 | PIK3R2 | 603157 | Ep-s |
| 274 | PLCB1  | 607120 | Ep-s |
| 275 | PLP1   | 300401 | Ep-s |
| 276 | PLPBP  | 604436 | Ep-s |
| 277 | PNKP   | 605610 | Ep-s |
| 278 | PNPO   | 603287 | Ep-s |

|     |          |        |      |
|-----|----------|--------|------|
| 279 | POLG     | 174763 | Ep-s |
| 280 | POLR3A   | 614258 | Ep-r |
| 281 | POLR3B   | 614366 | Ep-s |
| 282 | PPT1     | 600722 | Ep-s |
| 283 | PRDM8    | 616639 | Ep-s |
| 284 | PRICKLE1 | 608500 | Ep-s |
| 285 | PRIMA1   | 613851 | Ep-s |
| 286 | PRODH    | 606810 | Ep-s |
| 287 | PRRT2    | 614386 | Ep-s |
| 288 | PSAP     | 176801 | Ep-s |
| 289 | PSAT1    | 610936 | Ep-s |
| 290 | PSPH     | 172480 | Ep-s |
| 291 | PTS      | 612719 | Ep-s |
| 292 | PURA     | 600473 | Ep-s |
| 293 | PYCR2    | 616406 | Ep-s |
| 294 | QDPR     | 612676 | Ep-s |
| 295 | RAB39B   | 300774 | Ep-s |
| 296 | RELN     | 600514 | Ep-s |
| 297 | RMND1    | 614917 | Ep-s |
| 298 | RNASEH2A | 606034 | Ep-s |
| 299 | RNASEH2B | 610326 | Ep-s |
| 300 | RNASEH2C | 610330 | Ep-s |
| 301 | RNASET2  | 612944 | Ep-s |
| 302 | RNF216   | 609948 | Ep-s |
| 303 | ROGDI    | 614574 | Ep-s |
| 304 | RORB     | 601972 | Ep-s |
| 305 | SAMHD1   | 606754 | Ep-s |
| 306 | SCARB2   | 602257 | Ep-s |
| 307 | SCN1A    | 182389 | Ep-s |
| 308 | SCN1B    | 600235 | Ep-s |
| 309 | SCN2A    | 182390 | Ep-s |
| 310 | SCN8A    | 600702 | Ep-s |
| 311 | SCN9A    | 603415 | Ep-s |
| 312 | SCO1     | 603644 | Ep-m |
| 313 | SDHA     | 600857 | Ep-s |

|     |          |        |      |
|-----|----------|--------|------|
| 314 | SDHAF1   | 612848 | Ep-m |
| 315 | SERAC1   | 614725 | Ep-s |
| 316 | SERPINI1 | 602445 | Ep-s |
| 317 | SIK1     | 605705 | Ep-s |
| 318 | SLC12A5  | 606726 | Ep-s |
| 319 | SLC13A5  | 608305 | Ep-s |
| 320 | SLC16A1  | 600682 | Ep-s |
| 321 | SLC19A3  | 606152 | Ep-s |
| 322 | SLC1A2   | 600300 | Ep-s |
| 323 | SLC1A3   | 600111 | Ep-s |
| 324 | SLC25A1  | 190315 | Ep-s |
| 325 | SLC25A12 | 603667 | Ep-s |
| 326 | SLC25A15 | 603861 | Ep-s |
| 327 | SLC25A22 | 609302 | Ep-s |
| 328 | SLC2A1   | 138140 | Ep-s |
| 329 | SLC35A2  | 314375 | Ep-s |
| 330 | SLC35A3  | 605632 | Ep-s |
| 331 | SLC39A8  | 608732 | Ep-s |
| 332 | SLC46A1  | 611672 | Ep-s |
| 333 | SLC6A1   | 137165 | Ep-s |
| 334 | SLC6A5   | 604159 | Ep-s |
| 335 | SLC6A8   | 300036 | Ep-s |
| 336 | SLC6A9   | 601019 | Ep-s |
| 337 | SLC9A6   | 300231 | Ep-s |
| 338 | SMARCA2  | 600014 | Ep-s |
| 339 | SMC1A    | 300040 | Ep-s |
| 340 | SMS      | 300105 | Ep-s |
| 341 | SNAP25   | 600322 | Ep-s |
| 342 | SNIP1    | 608241 | Ep-s |
| 343 | SNORD118 | 616663 | Ep-r |
| 344 | SOX10    | 602229 | Ep-s |
| 345 | SPATA5   | 613940 | Ep-s |
| 346 | SPTAN1   | 182810 | Ep-s |
| 347 | SRPX2    | 300642 | Ep-s |
| 348 | ST3GAL3  | 606494 | Ep-s |

|     |         |        |      |
|-----|---------|--------|------|
| 349 | ST3GAL5 | 604402 | Ep-s |
| 350 | STX1B   | 601485 | Ep-s |
| 351 | STXBP1  | 602926 | Ep-s |
| 352 | SUMF1   | 607939 | Ep-s |
| 353 | SUOX    | 606887 | Ep-s |
| 354 | SURF1   | 185620 | Ep-s |
| 355 | SYN1    | 313440 | Ep-s |
| 356 | SYNGAP1 | 603384 | Ep-s |
| 357 | SYNJ1   | 604297 | Ep-s |
| 358 | SYP     | 313475 | Ep-s |
| 359 | SZT2    | 615463 | Ep-s |
| 360 | TAF1    | 313650 | Ep-s |
| 361 | TBC1D24 | 613577 | Ep-s |
| 362 | TBCD    | 604649 | Ep-s |
| 363 | TBCE    | 604934 | Ep-s |
| 364 | TBCK    | 616899 | Ep-s |
| 365 | TBL1XR1 | 608628 | Ep-s |
| 366 | TCF4    | 602272 | Ep-s |
| 367 | TPP1    | 607998 | Ep-s |
| 368 | TREX1   | 606609 | Ep-s |
| 369 | TSC1    | 605284 | Ep-s |
| 370 | TSC2    | 191092 | Ep-s |
| 371 | TTC19   | 613814 | Ep-m |
| 372 | TUBB3   | 602661 | Ep-s |
| 373 | TUBB4A  | 602662 | Ep-s |
| 374 | TWINK   | 606075 | Ep-s |
| 375 | UBA5    | 610552 | Ep-s |
| 376 | UBE2A   | 312180 | Ep-s |
| 377 | UBE3A   | 601623 | Ep-s |
| 378 | UNC80   | 612636 | Ep-s |
| 379 | VAR2    | 612802 | Ep-s |
| 380 | VPS13A  | 605978 | Ep-s |
| 381 | WDR26   | 617424 | Ep-s |
| 382 | WDR45   | 300526 | Ep-s |
| 383 | WWOX    | 605131 | Ep-s |

|     |         |        |      |
|-----|---------|--------|------|
| 384 | YY1     | 600013 | Ep-s |
| 385 | ZDHHC9  | 300646 | Ep-s |
| 386 | ZEB2    | 605802 | Ep-s |
| 387 | ZFYVE26 | 612012 | Ep-s |

---

Abbreviations: genes associated with epilepsy, epileptic syndromes and seizures (Ep-s), genes related to epilepsy (Ep-r), genes related to mitochondrial diseases and epilepsy (Ep-m).
