# Supplementary material
Source: publisher figshare collection journal article supplement (https://karger.figshare.com/articles/dataset/_/12533309)

CAATCGAGATG

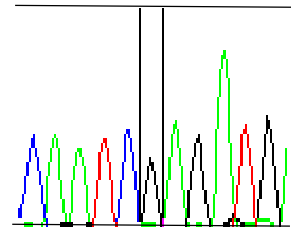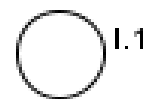

I.1

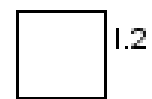

I.2

CAATCGAGATG

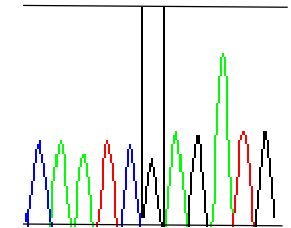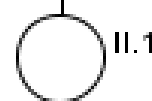

II.1

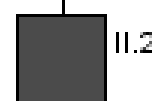

II.2

CAATCGAGATG

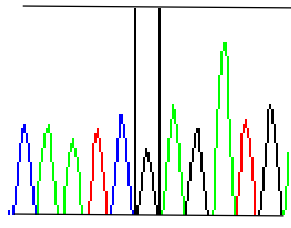

CAATC<sup>G</sup>/del

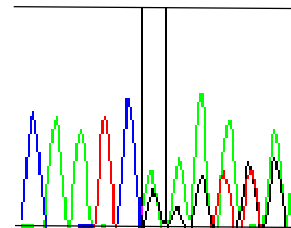

Supplement: Supplementary file 1 [file 1]
